# Supplementary material
Source: PubMed Central journal article supplement (PMC5207118)
Supplement: ry152100suppa1.pdf [file ry152100suppa1.pdf]

**Table E1. Baseline Patient and Disease Characteristics and Prior Procedures in 606 Patients**

| Parameter                                                          | Value                   |
|--------------------------------------------------------------------|-------------------------|
| Patient sex                                                        |                         |
| Women                                                              | 233 (38.4)              |
| Men                                                                | 373 (61.6)              |
| Age (y) <sup>*</sup>                                               | 61.5 ± 12.7 (20.8–91.9) |
| Race <sup>†</sup>                                                  |                         |
| White or Caucasian                                                 | 398 (77.7)              |
| Black or African American                                          | 67 (13.1)               |
| Hispanic or Latino                                                 | 17 (3.3)                |
| Asian                                                              | 12 (2.3)                |
| Other                                                              | 18 (3.5)                |
| Eastern Cooperative Oncology Group performance status <sup>‡</sup> |                         |
| Grade 0                                                            | 168 (65.4)              |
| Grade 1                                                            | 72 (28.0)               |
| Grade 2                                                            | 14 (5.4)                |
| Grade 3                                                            | 3 (1.2)                 |
| Site of primary tumor <sup>§</sup>                                 |                         |
| Colon                                                              | 443 (73.3)              |
| Rectum                                                             | 133 (22.0)              |
| Colorectal                                                         | 28 (4.6)                |
| Primary tumor in situ <sup>  </sup>                                | 78 (13.0)               |
| Metastases <sup>#</sup>                                            |                         |
| Synchronous                                                        | 396 (69.6)              |
| Extrahepatic metastases                                            |                         |
| Yes                                                                | 213 (35.1)              |
| No                                                                 | 393 (64.9)              |
| Lung                                                               | 148 (24.4)              |
| Lymph node                                                         | 67 (11.1)               |
| Peritoneum                                                         | 17 (2.8)                |
| Bone                                                               | 30 (5.0)                |
| Other                                                              | 38 (6.3)                |
| Median CEA level (µg/L) <sup>**</sup>                              | 62.2 (283.4)            |
| Ascites <sup>††</sup>                                              | 28 (4.7)                |
| Prior liver-directed procedures                                    |                         |
| Any                                                                | 183 (30.2)              |
| Surgery and/or ablation                                            | 168 (27.7)              |
| Vascular therapy (HAI, TACE, TAE)                                  | 37 (6.1)                |
| Upper abdominal radiation                                          | 7 (1.2)                 |
| Stereotactic external-beam radiation therapy                       | 4 (0.7)                 |
| Prior systemic chemotherapy treatment courses for mCRC             |                         |
| None                                                               | 35 (6.0)                |
| One treatment course                                               | 206 (35.3)              |
| Two treatment courses                                              | 184 (31.6)              |

|                                                                         |                 |
|-------------------------------------------------------------------------|-----------------|
| At least three treatment courses                                        | 158 (27.1)      |
| Unknown                                                                 | 23 (3.8)        |
| Median time from mCRC diagnosis to radioembolization (mo) <sup>††</sup> | 16.3 (0.4–96.3) |
| Treated target                                                          |                 |
| Whole liver, single session with or without repeat treatment            | 179 (29.5)      |
| Whole liver, sequential                                                 | 218 (36.0)      |
| Right lobe with or without segmental                                    | 168 (27.7)      |
| Left lobe with or without segmental                                     | 33 (5.4)        |
| Segmental                                                               | 5 (0.8)         |

Note.—Data are numbers of patients with percentages in parentheses, unless indicated otherwise. Synchronous metastases are defined as those identified within 4 months (120 days) of the primary tumor. HAI = hepatic arterial infusion chemotherapy, TACE = transarterial chemoembolization, TAE = transarterial embolization

\* Data are the mean  $\pm$  standard deviation, with the range in parentheses.

<sup>†</sup> Baseline patient data were missing in 94 patients.

<sup>‡</sup> Baseline patient data were missing in 349 patients.

<sup>§</sup> Baseline patient data were missing in two patients.

<sup>||</sup> Baseline patient data were missing in six patients.

<sup>#</sup> Baseline patient data were missing in 37 patients.

<sup>\*\*</sup> Baseline patient data were missing in 176 patients. Data in parentheses are the interquartile range.

<sup>††</sup> Baseline patient data were missing in 15 patients.

<sup>††</sup> Data in parentheses are the range.
